# Supplementary material for: A facile process to achieve hysteresis-free and fully stabilized graphene field-effect transistors
Source: Royal Society of Chemistry journal article supplement (doi:10.1039/c4nr06397j), 2015-01-01
Supplement: c4nr06397j1.pdf [file c4nr06397j1.pdf]

## **Electronic Supporting Information**

# **A Facile Process to Achieve Hysteresis-free and Fully Stabilized Graphene Field-effect Transistors**

Yun Ji Kim, Young Gon Lee, Ukjin Jung, Sangchul Lee, Sang Kyung Lee, and Byoung Hun

Lee\*

Center for Emerging Electric Devices and Systems,  
School of Materials Science and Engineering, Gwangju Institute of Science and Technology,  
Oryong-dong 1, Buk-gu, Gwangju 500-712, Korea

\*Authors to whom any correspondence should be addressed.

E-mail: [bhl@gist.ac.kr](mailto:bhl@gist.ac.kr)

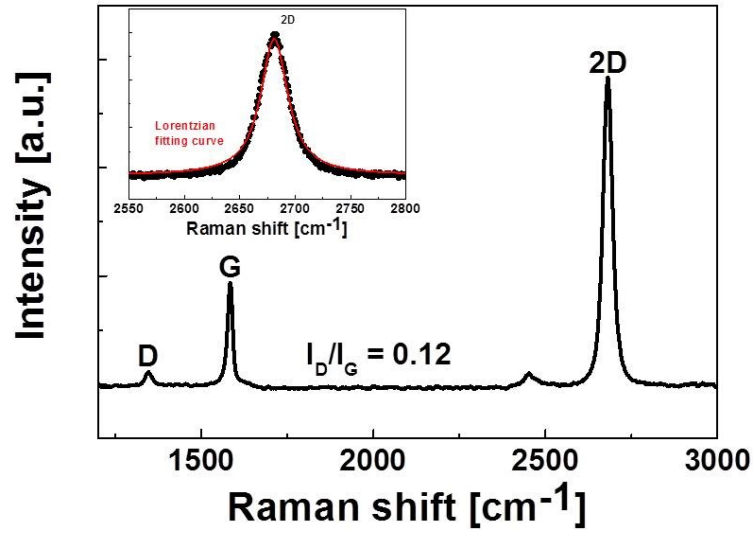

**Fig. S1** Raman spectrum of single layer graphene grown by CVD after transfer process. The insert figure shows 2D peak which was fitted by Lorentz curve. Also in this case  $I_D/I_G$ , which indicates the quality of graphene, is about 0.12

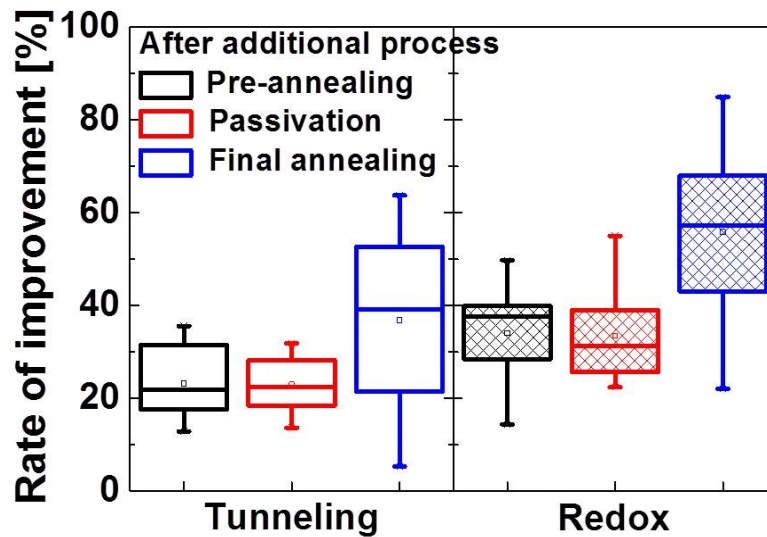

**Fig. S2** Rate of improvement related tunneling and redox charge density on the basis of previous process. Through final annealing, tunneling and redox charge density decrease drastically.
